# Supplementary material
Source: Springer Nature journal article supplement (https://www.springermedizin.de/resource/supplementary/12874_2012_914_MOESM5_ESM.pdf/9433050)

Ages 60–69

Ages 80+

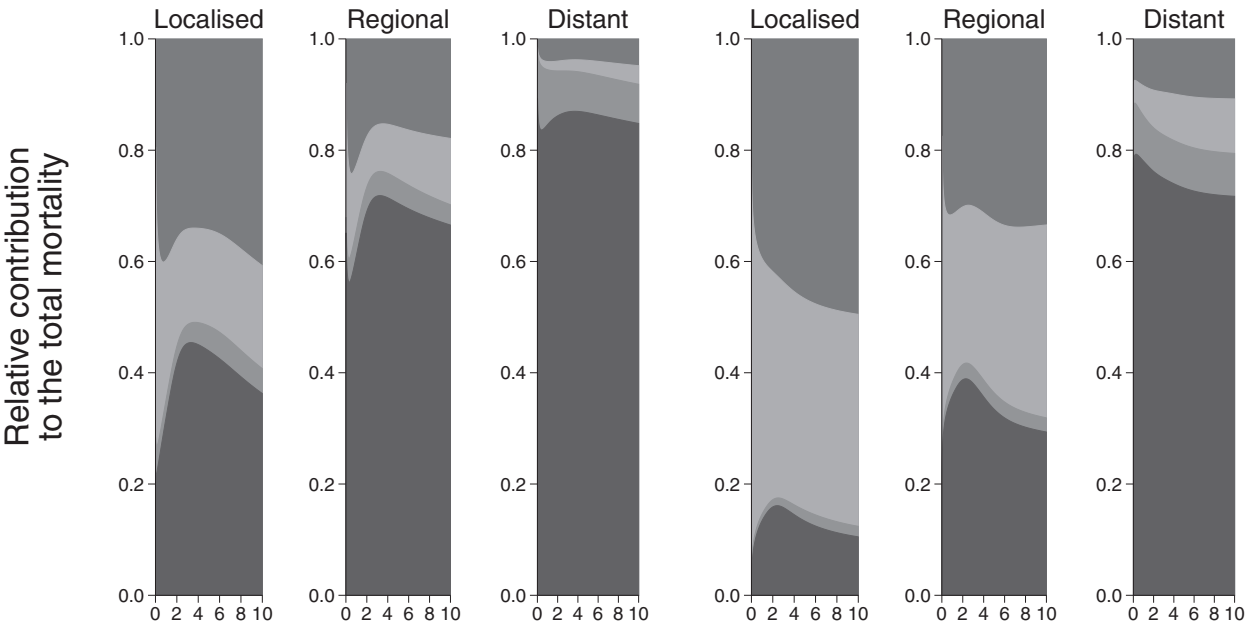

Time since diagnosis (years)

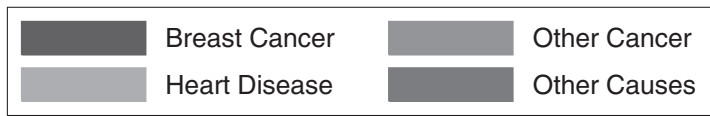

Supplement: MOESM5 [file 9433050]
